# Supplementary material
Source: ML conference proceedings conference paper supplement (https://openaccess.thecvf.com/content/WACV2024/html/Park_Hard-Label_Based_Small_WACV_2024_paper.html)
Supplement: Supplementary file 1 [file Park_Hard-Label_Based_Small_WACV_2024_supplemental.pdf]

# Supplemental Material

## 1 Dual Gradient Attack Method (DGM)

This supplemental material describes Dual Gradient white-box attack Method(DGM) which is adopted in SQBA attack method. DGM uses dual gradient vectors to effectively find perturbations. The procedure of DGM attack consists of two stages: (1) Generating adversarial perturbation, and (2) Fine-tuning generated perturbation.

### 1.1 Adversarial Perturbation

An input example  $x \in \mathbb{R}^m$  to be estimated by the  $k$ -class classifier  $F(x)$  can be seen as a data point located in a convex polyhedron [1], whose faces represent classes  $c_i$ , where  $i = 0, 1, \dots, k$ . The orthogonal distance from a class  $c_i$  to the data point  $x$  denotes the quantified classification probability, and it is expressed as  $\Delta(x; c_i)$ . The decision boundary of the classifier can be seen as an affine linear equation also in the polyhedron. Since the primary objective of adversarial attack is to modify input example  $x$  to mislead a target model, the true class  $c^\dagger$  and an adversarial class  $\tilde{c}$  need to be considered.

The orthogonal distance between  $c^\dagger$  and  $x$  is smaller than other classes in the polyhedron as  $\Delta(x; c^\dagger) < \Delta(x; c^i)$ ,  $\forall c^\dagger \neq c^i$ . To mislead the target model, therefore,  $\Delta(x; c^\dagger)$  needs to be increased by moving example  $x$  sufficiently to an adversarial region where belongs to another class  $c^i$ . DGM searches the optimal path to transport  $x$  by utilising two vectors,  $g^-$  and  $g^+$ , which are calculated with respect to the true class  $c^\dagger$  and a potential adversarial class  $c^i$  respectively. The vector  $g^-$  has the negative direction to the class, therefore, it moves  $x$  away from the true class. In contrast the positive directional vector  $g^+$  transports  $x$  closer to the adversarial class. The gradient vectors are calculated as:

$$g^{+/-} = \begin{cases} l_2 & : \nabla_F f_c(x) / \max(\nabla_F f_c(x)) \\ l_\infty & : \text{sign}(\nabla_F f_c(x)) \end{cases} \quad (1)$$

where  $\nabla_F f_c(x)$  is a gradient vector obtained from the backward process of  $F(x)$  with input example  $x$  and associated class  $c$ . DGM iteratively conducts such process to efficiently find the optimal direction of adversarial perturbation vector  $\mu_t$  as:

$$\mu_t = (-\alpha_t)g_t^- + (1 - \alpha_t)g_t^+ \quad (2)$$

where  $\alpha_t \in [0, 0.3]$  is a penalty parameter applied to both directional vectors. The penalty parameter is used to help the stable convergence in searching an optimal vector  $\mu_t$ , and updated in every iteration as:

$$\alpha_t = \min\left(1/e^{4\lambda}, 0.3\right), \quad \text{where } \lambda = \frac{f_{c_t^i}(x'_t)}{(f_{c_t^\dagger}(x'_t) + f_{c_t^i}(x'_t))} \quad (3)$$

---

**Algorithm 1** DGM Adversarial Example Computation

---

**input:** example  $x$ , true class  $c^\dagger$ , classifier  $f$

**output:** adversarial example  $\tilde{x}$

**while** TRUE **do**

$\{c_t^0, c_t^1, \dots\} = \text{Sort}(f(x'_t), \text{descend})$

**if**  $c_t^0 \neq c^\dagger$  **then** Break; **end**

$\tilde{c} = c_t^1$

$\alpha_t = \text{Equation (3)} \leftarrow \tilde{c}, c^\dagger$

$g_t^+ = \text{Equation (1)} \leftarrow \tilde{c}$

$g_t^- = \text{Equation (1)} \leftarrow c^\dagger$

$\mu_t = \text{Equation (2)}$

$x'_{t+1} = \text{Equation (4)}$

$t = t + 1$

**end while**

$\tilde{x} = \text{Tune}(x'_t)$

---

---

**Algorithm 2** DGM Adversarial Example Tuning

---

**input:** example  $x$ , initial adversary  $x'$ , true class  $c^\dagger$ , classifier  $f$

**output:** adversarial example  $\tilde{x}$

$t = 0, x'_t = x'$

**while** TRUE **do**

$\tilde{x} = x'_t$

$\mathcal{J} = \text{MSE}(x, x'_t)$

$x'_t = \text{ADAM}(x'_t, \mathcal{J})$

$c'_t = \arg \max[f(x'_t)]$

**if**  $c'_t == c^\dagger$  **then** Break; **end**

$t = t + 1$

**end while**

$\tilde{x} = x'_t$

---

Finally an intermediate adversarial example is calculated with a scaling factor  $\epsilon \leq 1$ , which is a small positive value as

$$x'_{t+1} = \text{clamp}(x'_t + \epsilon \mu_t) \Big|_{[\min(x), \max(x)]}. \quad (4)$$

Algorithm 1 outlines the process to find an adversarial example with DGM method.

## 1.2 Adversary Tuning

Attack method discussed in the previous section focuses on the effectiveness in finding an adversarial example  $\tilde{x}$ , which successfully leads to the misclassification with a high classification probability yet. One other objective of the attack is finding the minimum perturbation to make the adversarial example  $\tilde{x}$  sufficiently close to the input example  $x$ . Input example can be seen as a fixed data point. Therefore, the goal of this optimisation is to find  $\delta$  that minimises  $l_2$  distance between  $x$  and  $\tilde{x}$ . DGM solves such problem by formulating a simple objective of the iterative optimisation

with Mean Square Error (MSE) as:

$$\min (\text{MSE}(x, \tilde{x})), \quad \text{such that } \tilde{x} \in [\min(x), \max(x)]^m \quad (5)$$

where  $\tilde{x} = x + \delta$  is an adversarial example. To achieve the goal to find  $\delta$  that minimises  $\text{MSE}(x, \tilde{x})$ , ADAM [2] optimiser is deployed in DGM method as detailed in Algorithm 2.

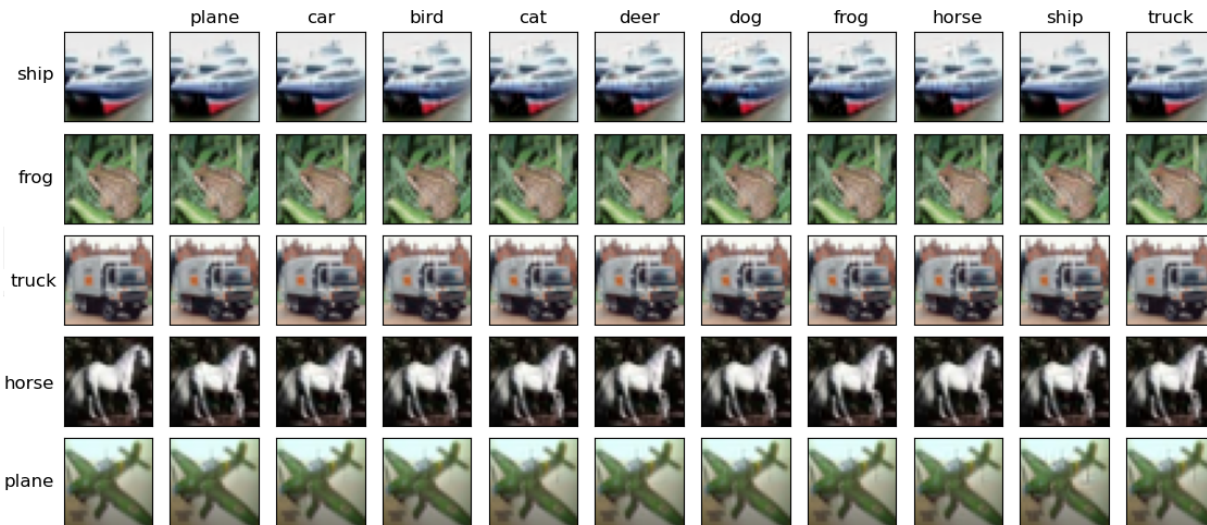

Figure 1: Examples of targeted attack. DGM  $l_2$  attack is applied to the CIFAR-10 dataset performing the targeted attack for each source/target pair. First column is the clean images

## References

- [1] S.M.M. Dezfouli and A. Fawzi and P. Frossard and E.P.F. Lausanne *"DeepFool: A Simple and Accurate Method to Fool Deep Neural Networks"* IEEE Conference on Computer Vision and Pattern Recognition, 2016.
- [2] D.P. Kingma and J. Ba *"Adam: A Method for Stochastic Optimization"* International Conference on Learning Representation, 2015.
